# Supplementary material for: Disaster response knowledge and its social determinants: A cross-sectional study in Beijing, China
Source: PubMed Central journal article supplement (PMC6435165; doi:10.1371/journal.pone.0214367), 2019-03-26
Supplement: pone.0214367.s001.pdf [file pone.0214367.s001.pdf]

7. If you are in the location of a gas attack or chemical leakage, please choose the right direction of escape:

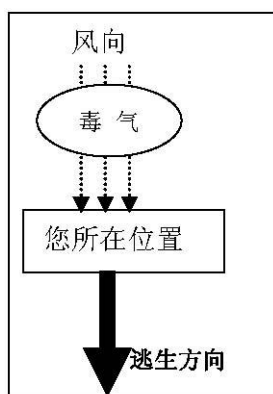

①

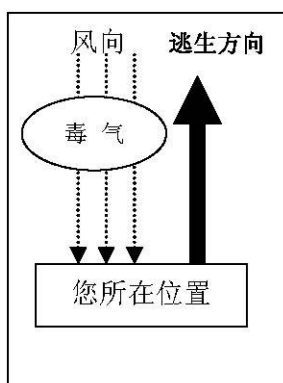

②

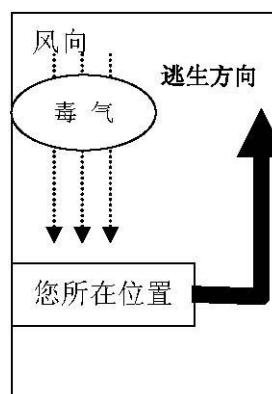

③

④ Do not know

8. If there is a radioactive accident nearby, you think the following is correct:

- ① Keep ventilated
- ② Hide under trees or near tall building
- ③ Immediately hide inside and close doors and windows
- ④ Run outside and wait for help
- ⑤ Do not know

9. If you are indoors during an earthquake, what you think is the right thing to do:

- ① Lie flat on your back
- ② Stretch and relax as much as you can
- ③ Curl up as close as you can and put your hands on your head
- ④ Keep your body standing
- ⑤ Do not know

10. If you are outdoors during an earthquake, what you think is the right thing to do:

- ① Return to a room immediately
- ② Choose to squat or lie down in an open area
- ③ Hide near tall buildings
- ④ Hide near tall trees
- ⑤ Do not know

11. In an earthquake, if there is no time to get out of the house, the indoor unsafe place is:

- ① Narrow space in toilet, kitchen, storeroom narrow space
- ② Next to solid furniture
- ③ Internal load-bearing wall corner
- ④ On a window or balcony
- ⑤ Do not know

12. Is the following about the earthquake self-help and mutual rescue correct?

(1) Once buried, must insist on calling for help loudly

- ① Yes
- ② No
- ③ Do not know



5. Education:

- ① None
- ② Primary school
- ③ Junior high school
- ④ Senior high school
- ⑤ Technician training school
- ⑥ Technical secondary school (technical secondary school)
- ⑦ Junior college
- ⑧ Bachelor degree or above

6. Household location:      ①Urban              ②Rural              ③Peri-urban
