# Supplementary material for: Disaster response knowledge and its social determinants: A cross-sectional study in Beijing, China
Source: PLoS One. 2019 Mar 26;14(3):e0214367. doi: 10.1371/journal.pone.0214367 (PMC6435165; doi:10.1371/journal.pone.0214367)
Supplement: S2 File — (PDF) [file pone.0214367.s002.pdf]

## 卫生应急相关知识调查问卷

1. 您认为以下方法能够有效预防呼吸道传染病吗？（请分别判断）

- |                   |                             |                              |                               |
|-------------------|-----------------------------|------------------------------|-------------------------------|
| (1) 不随地吐痰         | <input type="checkbox"/> ①能 | <input type="checkbox"/> ②不能 | <input type="checkbox"/> ③不知道 |
| (2) 不喝生水          | <input type="checkbox"/> ①能 | <input type="checkbox"/> ②不能 | <input type="checkbox"/> ③不知道 |
| (3) 勤通风           | <input type="checkbox"/> ①能 | <input type="checkbox"/> ②不能 | <input type="checkbox"/> ③不知道 |
| (4) 流行季节不到人群密集的场所 | <input type="checkbox"/> ①能 | <input type="checkbox"/> ②不能 | <input type="checkbox"/> ③不知道 |

2. 您认为以下方法能够有效预防消化道传染病吗？（请分别判断）

- |                 |                             |                              |                               |
|-----------------|-----------------------------|------------------------------|-------------------------------|
| (1) 戴口罩         | <input type="checkbox"/> ①能 | <input type="checkbox"/> ②不能 | <input type="checkbox"/> ③不知道 |
| (2) 勤洗手         | <input type="checkbox"/> ①能 | <input type="checkbox"/> ②不能 | <input type="checkbox"/> ③不知道 |
| (3) 生熟食物分开保存和加工 | <input type="checkbox"/> ①能 | <input type="checkbox"/> ②不能 | <input type="checkbox"/> ③不知道 |
| (4) 不随地大小便      | <input type="checkbox"/> ①能 | <input type="checkbox"/> ②不能 | <input type="checkbox"/> ③不知道 |

3. 如果您周围发现大量的病死禽畜，以下做法正确吗？

- |                |                              |                               |                               |
|----------------|------------------------------|-------------------------------|-------------------------------|
| (1) 宰杀，彻底煮熟后食用 | <input type="checkbox"/> ①正确 | <input type="checkbox"/> ②不正确 | <input type="checkbox"/> ③不知道 |
| (2) 一般方法掩埋     | <input type="checkbox"/> ①正确 | <input type="checkbox"/> ②不正确 | <input type="checkbox"/> ③不知道 |
| (3) 焚烧后深埋      | <input type="checkbox"/> ①正确 | <input type="checkbox"/> ②不正确 | <input type="checkbox"/> ③不知道 |
| (4) 报告动物检疫部门   | <input type="checkbox"/> ①正确 | <input type="checkbox"/> ②不正确 | <input type="checkbox"/> ③不知道 |

4. 如果有人误食了农药或其他有毒化学品，以下做法中正确的是：

- |                                      |                                       |
|--------------------------------------|---------------------------------------|
| <input type="checkbox"/> ①立即喝大量清水后就医 | <input type="checkbox"/> ②立即刺激舌根催吐后就医 |
| <input type="checkbox"/> ③立即喝肥皂水后就医  | <input type="checkbox"/> ④不知道         |

5. 聚餐后，如果发现有很多人出现恶心、呕吐、腹痛、腹泻的症状，应该立即销毁最近吃过的所有食物，这种做法正确吗？

- ☐①正确      ☐②不正确      ☐③不知道

6. 如果发生了重大的交通事故，可以拨打以下哪个电话求助？

- ☐①112      ☐②114      ☐③122      ☐④不知道

7. 如果您所在的位置遭毒气袭击或化学品泄漏，请选择正确的逃生方向：

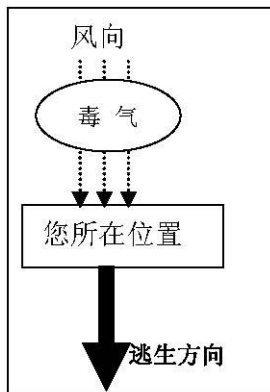

☐①

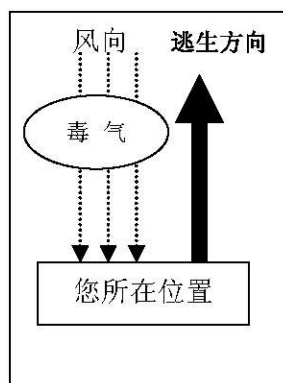

☐②

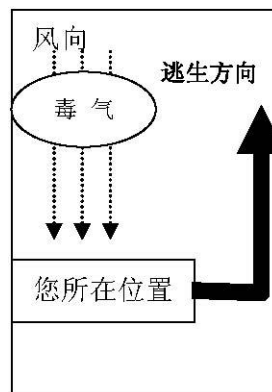

☐③

☐④不知道

8. 如果周围有放射性事故发生，您认为以下做法正确的是：

- |                                        |                                                                    |
|----------------------------------------|--------------------------------------------------------------------|
| <input type="checkbox"/> ①打开门窗，保持通风    | <input type="checkbox"/> ②躲到树下或高大建筑物旁边                             |
| <input type="checkbox"/> ③立即躲避到屋内，关闭门窗 | <input type="checkbox"/> ④跑到室外空地等待救援 <input type="checkbox"/> ⑤不知道 |

9. 下列室内躲避地震的做法中，您认为正确的是：

- |                                         |                                                                  |
|-----------------------------------------|------------------------------------------------------------------|
| <input type="checkbox"/> ①平躺在室内的空地上     | <input type="checkbox"/> ②尽可能舒展身体，保持放松                           |
| <input type="checkbox"/> ③身体尽量蜷曲缩小，双手抱头 | <input type="checkbox"/> ④保持身体站立状态 <input type="checkbox"/> ⑤不知道 |

10. 地震时，如果您在室外，您认为正确的做法是：

6. 家庭住址: (1)城市 (2)农村 (3)城镇
